# Supplementary material for: Rates of hypoxia induction alter mechanisms of O2 uptake and the critical O2 tension of goldfish
Source: Oxford University Press journal article supplement (doi:10.1242/jeb.154948), 2017-01-01
Supplement: jeb154948supp.pdf [file jeb154948supp.pdf]

## Supplementary Material

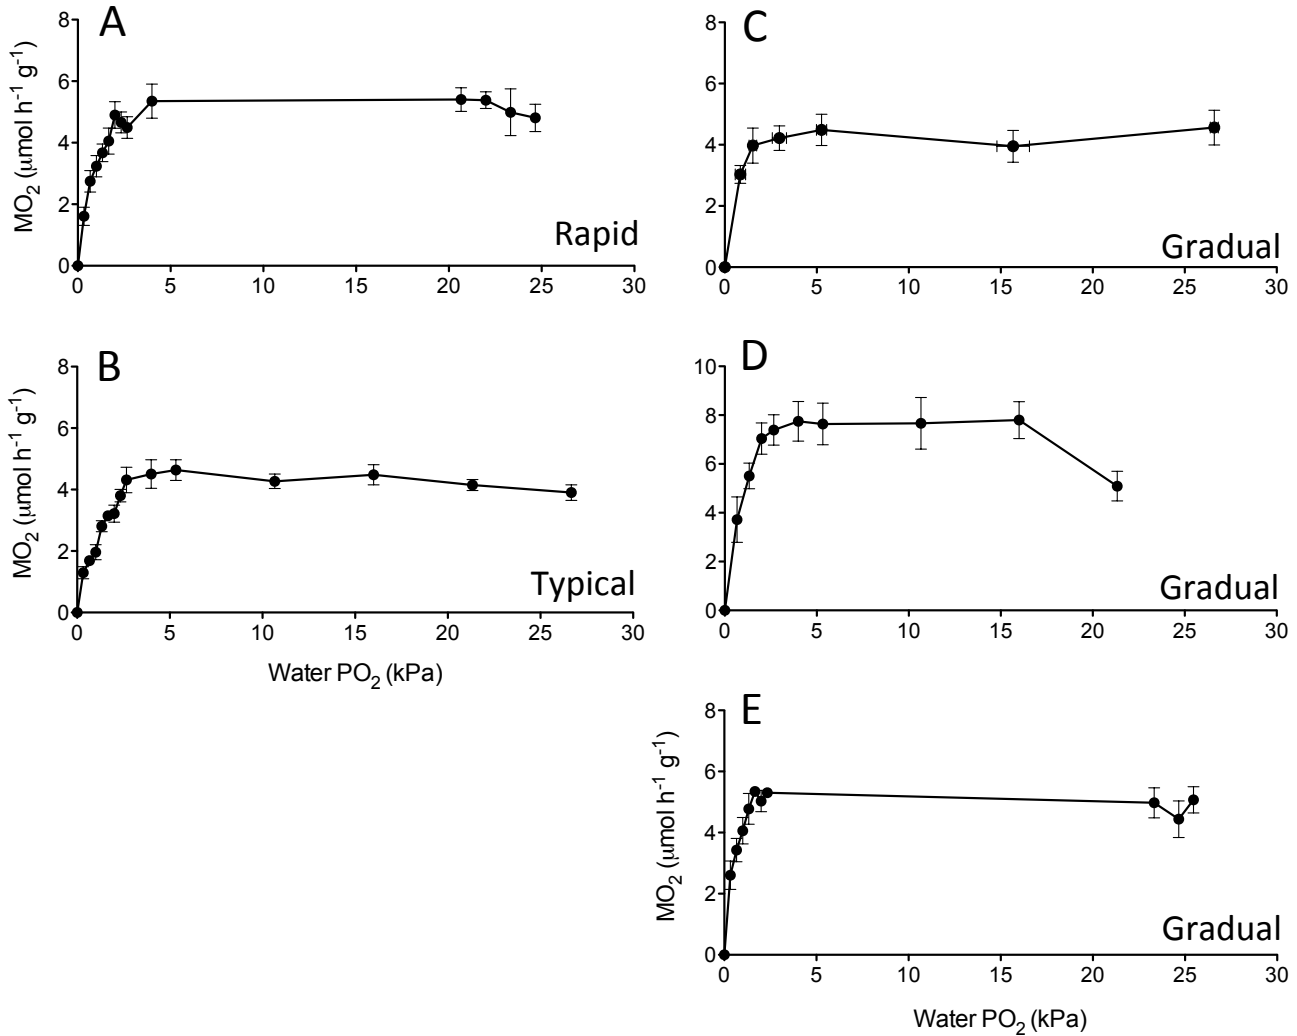

**Figure S1. The effect of water  $PO_2$  on the  $MO_2$  of goldfish exposed to rapid, typical and gradual rates of hypoxic induction.** The different rates were achieved through different  $P_{crit}$  trial durations, and each of the five  $P_{crit}$  trials used a different respirometric technique to achieve its respective duration. Details on techniques are included in the Materials and Methods section, but briefly (A) was achieved using a variation on intermittent flow respirometry ( $N=5$ ; average duration  $24\pm 2$  min), (B) was achieved using closed-circuit respirometry ( $N=6$ ; average duration  $84\pm 8$  min), (C) was achieved using flow-through respirometry ( $N=6$ ; average duration  $562\pm 19$  min), (D) was achieved using closed-circuit respirometry with an additional water volume ( $N=6$ ; average duration  $434\pm 56$  min), and (E) was achieved using a variation on intermittent flow respirometry ( $N=4$ ; average duration  $444\pm 12$  min).
